# Supplementary material
Source: PubMed Central journal article supplement (PMC4503657)
Supplement: 14_243_Mezzaroma.Suppl.pdf [file 14_243_Mezzaroma.Suppl.pdf]

Supplemental Data

Role of Interleukin-1 in Radiation-Induced Cardiomyopathy

Eleonora Mezzaroma,<sup>1,2,3</sup> Ross B Mikkelsen,<sup>4</sup> Stefano Toldo,<sup>1,2</sup> Adolfo G Mauro,<sup>1,2</sup> Khushboo Sharma,<sup>5</sup> Carlo Marchetti,<sup>1,2</sup> Asim Alam,<sup>4</sup> Benjamin W Van Tassel,<sup>1,2,3</sup> David A Gewirtz,<sup>5</sup> and Antonio Abbate<sup>1,2</sup>

Online address: <http://www.molmed.org>

The Feinstein Institute for Medical Research North Shore LIJ  
Empowering Imagination. Pioneering Discovery.\*

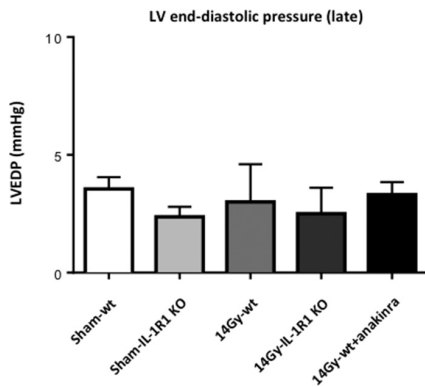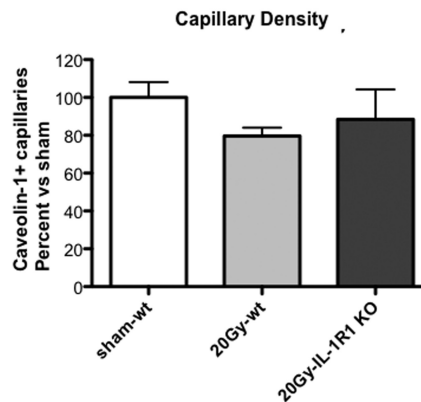

**Supplementary Figure S1.** Hemodynamic measurements. Left Ventricular End Diastolic Pressure (LVEDP) measure in the groups of mice irradiated with 14Gy XRT. XRT= Radiation therapy; Gy=Gray; IL-1R1 KO=Interleukin-1 receptor type I Knock out mice; wt=wild type.

**Supplementary Figure S3.** Capillary density. Quantification of the caveolin-1 staining used to evaluate capillary density, in 20 Gy irradiated mice 4 months after receiving XRT treatment. XRT= Radiation therapy; Gy=Gray; IL-1R1 KO=Interleukin-1 receptor type I Knock out mice; wt=wild type.

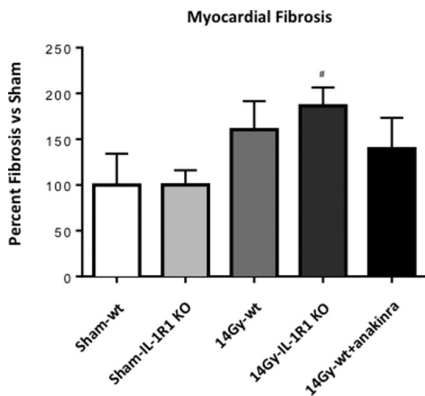

<sup>#</sup>P<0.05vs sham-IL-1R1 KO

**Supplementary Figure S2.** Myocardial fibrosis. Total amount of interstitial collagen measured 6 months (14Gy) after XRT. XRT= Radiation therapy; Gy=Gray; IL-1R1 KO=Interleukin-1 receptor type I Knock out mice; wt=wild type.

**Supplementary Table S1.** Left ventricular diameters at 4 months.

|                  | LVEDD (mm) | LVESD (mm) |
|------------------|------------|------------|
| Sham-wt          | 3.4±0.1    | 2.2±0.1    |
| Sham-IL-1R1 KO   | 3.3±0.1    | 2.2±0.1    |
| 20Gy-wt          | 3.3±0.1    | 2.3±0.1    |
| 20Gy-IL-1R1 KO   | 3.2±0.1    | 2.1±0.1    |
| 20Gy-wt+anakinra | 3.1±0.5    | 2.1±0.3    |

LVEDD=left ventricular end diastolic diameter; LVESD=left ventricular end systolic diameter; IL-1R1 KO=Interleukin-1 receptor type 1 Knock Out mice; Gy=Gray.

**Supplementary Table S2.** Hemodynamic parameters 14Gy.

|                  | LVPSP (mmHg) | LVEDP (mmHg) | +dP/dt (mmHg/s) | -dP/dt (mmHg/s) |
|------------------|--------------|--------------|-----------------|-----------------|
| wt-14Gy          | 58.0±2.5*    | 3.0±1.6      | 3833±895        | -3383±722       |
| IL-1R1 KO-14Gy   | 62.7±5.6     | 2.1±0.8      | 4758±713        | -3731±494       |
| wt-14Gy+anakinra | 58.4±3.5     | 3.3±0.5      | 2600±268        | -2329±359       |

LVPSP=left ventricular peak systolic pressure; LVEDP=left ventricular end diastolic pressure; IL-1R1 KO=Interleukin-1 receptor type 1 Knock Out mice; Gy=Gray. \*P<0.05 vs sham-wt.
